# Supplementary material
Source: PubMed Central journal article supplement (PMC2889790)

## SUPPLEMENTARY DATA

TABLE S1. Transformation of wheat with *TaALMT1*

| Exp. no. | Number of embryos | Embryo age (days after anthesis) | Recovered plants | Positive for transgene | Efficiency |
|----------|-------------------|----------------------------------|------------------|------------------------|------------|
| 1        | 255               | 14                               | 2                | 1                      | 0.39%      |
| 2        | 117               | 14                               | 1                | 1                      | 0.85%      |
| 3        | 56                | 14                               | 0                | -                      | 0%         |
| 4        | 125               | 14/15                            | 0                | -                      | 0%         |
| 5        | 95                | 15                               | 8                | 6                      | 6.31%      |
| 6        | 145               | 15/16                            | 7                | 5                      | 3.44%      |
| 7        | 83                | 16                               | 0                | -                      | 0%         |
| Total    | 876               |                                  | 18               | 13                     |            |
| Mean     |                   |                                  |                  |                        | 1.5%       |

Shown for each of the experiments are the number of embryos bombarded, the number of recovered plants, the number of recovered plants shown to contain the transgene by PCR and the calculated efficiency of transformation.

TABLE S2. Scoring  $T_2$  families for  $Al^{3+}$  resistance

|                               |             |             |             |             |             |             |              |              |              |                     |
|-------------------------------|-------------|-------------|-------------|-------------|-------------|-------------|--------------|--------------|--------------|---------------------|
| <b>Families of T2_1 line</b>  | <b>1_1</b>  | <b>1_2</b>  | <b>1_6</b>  | <b>1_7</b>  | <b>1_8</b>  | <b>1_9</b>  | <b>1_11</b>  | <b>1_13</b>  | <b>1_14</b>  | <b>1_19 (null)</b>  |
| No. of resistant seedlings    | 10          | 10          | 19          | 8           | 15          | 11          | 13           | 11           | 13           | 0                   |
| No. of sensitive seedlings    | 6           | 6           | 0           | 6           | 0           | 6           | 4            | 6            | 4            | 20                  |
| Total seedlings               | 16          | 16          | 19          | 14          | 15          | 17          | 17           | 17           | 17           | 20                  |
| Probably homozygous           | No          | No          | Yes         | No          | Yes         | No          | No           | No           | No           | Negative control    |
| <b>Families of T2_2B line</b> | <b>2B_1</b> | <b>2B_2</b> | <b>2B_3</b> | <b>2B_4</b> | <b>2B_7</b> | <b>2B_8</b> | <b>2B_9</b>  | <b>2B_10</b> | <b>2B_13</b> | <b>2B_19 (null)</b> |
| No. of resistant seedlings    | 20          | 12          | 13          | 15          | 16          | 11          | 13           | 16           | 16           | 0                   |
| No. of sensitive seedlings    | 0           | 7           | 7           | 5           | 4           | 7           | 7            | 4            | 4            | 19                  |
| Total seedlings               | 20          | 19          | 20          | 20          | 20          | 18          | 20           | 20           | 20           | 19                  |
| Probably homozygous           | Yes         | No          | No          | No          | No          | No          | No           | No           | No           | Negative control    |
| <b>Families of T2_3 line</b>  | <b>3_1</b>  | <b>3_2</b>  | <b>3_3</b>  | <b>3_4</b>  | <b>3_5</b>  | <b>3_6</b>  | <b>3_7</b>   | <b>3_8</b>   | <b>3_9</b>   | <b>3_20 (null)</b>  |
| No. of resistant seedlings    | 17          | 19          | 19          | 21          | 18          | 18          | 16           | 16           | 14           | 0                   |
| No. of sensitive seedlings    | 4           | 0           | 2           | 0           | 2           | 0           | 4            | 4            | 6            | 20                  |
| Total seedlings               | 21          | 19          | 21          | 21          | 20          | 18          | 20           | 20           | 20           | 20                  |
| Probably homozygous           | No          | Yes         | No          | Yes         | No          | Yes         | No           | No           | No           | Negative control    |
| <b>Families of T2_4 line</b>  | <b>4_1</b>  | <b>4_2</b>  | <b>4_3</b>  | <b>4_4</b>  | <b>4_5</b>  | <b>4_6</b>  | <b>4_7</b>   | <b>4_8</b>   | <b>4_9</b>   | <b>4_13 (null)</b>  |
| No. of resistant seedlings    | 14          | 19          | 16          | 20          | 15          | 20          | 10           | 18           | 15           | 0                   |
| No. of sensitive seedlings    | 7           | 0           | 8           | 0           | 6           | 0           | 11           | 2            | 2            | 20                  |
| Total seedlings               | 21          | 19          | 24          | 20          | 21          | 20          | 21           | 20           | 17           | 20                  |
| Probably homozygous           | No          | Yes         | No          | Yes         | No          | Yes         | No           | No           | No           | Negative control    |
| <b>Families of T2_5 line</b>  | <b>5_1</b>  | <b>5_2</b>  | <b>5_3</b>  | <b>5_4</b>  | <b>5_5</b>  | <b>5_6</b>  | <b>5_7</b>   | <b>5_8</b>   | <b>5_9</b>   | <b>5_15</b>         |
| No. of resistant seedlings    | 10          | 19          | 19          | 19          | 0           | 0           | 19           | 15           | 19           | 20                  |
| No. of sensitive seedlings    | 10          | 0           | 0           | 0           | 0           | 0           | 5            | 2            | 1            | 0                   |
| Total seedlings               | 20          | 19          | 19          | 19          | 0           | 0           | 24           | 17           | 20           | 20                  |
| Probably homozygous           | No          | Yes         | Yes         | Yes         | missing     | missing     | No           | No           | No           | Yes                 |
| <b>Families of T2_8 line</b>  | <b>8_1</b>  | <b>8_2</b>  | <b>8_3</b>  | <b>8_4</b>  | <b>8_5</b>  | <b>8_7</b>  | <b>8_9</b>   | <b>8_11</b>  | <b>8_15</b>  | <b>8_16 (null)</b>  |
| No. of resistant seedlings    | 16          | 15          | 17          | 15          | 21          | 14          | 12           | 11           | 16           | 0                   |
| No. of sensitive seedlings    | 3           | 3           | 5           | 1           | 0           | 6           | 4            | 5            | 0            | 20                  |
| Total seedlings               | 19          | 18          | 22          | 16          | 21          | 20          | 16           | 16           | 16           | 20                  |
| Probably homozygous           | No          | No          | No          | No          | Yes         | No          | No           | No           | Yes          | Negative control    |
| <b>Families of T2_12 line</b> | <b>12_1</b> | <b>12_2</b> | <b>12_3</b> | <b>12_4</b> | <b>12_5</b> | <b>12_6</b> | <b>12_7</b>  | <b>12_8</b>  | <b>12_9</b>  | <b>12_19(null)</b>  |
| No. of resistant seedlings    | 12          | 19          | 13          | 12          | 16          | 12          | 18           | 17           | 13           | 0                   |
| No. of sensitive seedlings    | 4           | 0           | 3           | 3           | 2           | 3           | 0            | 3            | 5            | 18                  |
| Total seedlings               | 16          | 19          | 16          | 15          | 18          | 15          | 18           | 20           | 18           | 18                  |
| Probably homozygous           | No          | Yes         | No          | No          | No          | No          | Yes          | No           | No           | Negative control    |
| <b>Families of T2_14 line</b> | <b>14_1</b> | <b>14_2</b> | <b>14_3</b> | <b>14_4</b> | <b>14_5</b> | <b>14_6</b> | <b>14_7</b>  | <b>14_8</b>  | <b>14_9</b>  | <b>14_19(null)</b>  |
| No. of resistant seedlings    | 19          | 18          | 16          | 20          | 19          | 16          | 20           | 16           | 20           | 0                   |
| No. of sensitive seedlings    | 4           | 3           | 3           | 0           | 4           | 7           | 0            | 3            | 0            | 20                  |
| Total seedlings               | 23          | 21          | 19          | 20          | 23          | 23          | 20           | 19           | 20           | 20                  |
| Probably homozygous           | No          | No          | No          | Yes         | No          | No          | Yes          | No           | Yes          | Negative control    |
| <b>Families of T2_18 line</b> | <b>18_1</b> | <b>18_2</b> | <b>18_3</b> | <b>18_4</b> | <b>18_7</b> | <b>18_9</b> | <b>18_11</b> | <b>18_12</b> | <b>18_15</b> | <b>18_18(null)</b>  |

|                                      |              |              |              |              |              |              |               |               |               |                     |
|--------------------------------------|--------------|--------------|--------------|--------------|--------------|--------------|---------------|---------------|---------------|---------------------|
| No. of resistant seedlings           | 20           | 19           | 13           | 16           | 15           | 11           | 20            | 19            | 14            | 0                   |
| No. of sensitive seedlings           | 0            | 1            | 7            | 4            | 4            | 4            | 0             | 0             | 4             | 20                  |
| Total seedlings                      | 20           | 20           | 20           | 20           | 19           | 15           | 20            | 19            | 18            | 20                  |
| Probably homozygous                  | Yes          | No           | No           | No           | No           | No           | Yes           | Yes           | No            | Negative control    |
| <b>Families of T<sub>2</sub>_20A</b> | <b>20A_1</b> | <b>20A_2</b> | <b>20A_4</b> | <b>20A_6</b> | <b>20A_8</b> | <b>20A_9</b> | <b>20A_11</b> | <b>20A_13</b> | <b>20A_15</b> | <b>20A_18(null)</b> |
| No. of resistant seedlings           | 20           | 16           | 19           | 18           | 20           | 0            | 17            | 20            | 0             | 0                   |
| No. of sensitive seedlings           | 0            | 0            | 0            | 1            | 0            | 20           | 0             | 0             | 19            | 16                  |
| Total seedlings                      | 20           | 16           | 19           | 19           | 20           | 20           | 17            | 20            | 19            | 16                  |
| Probably homozygous                  | Yes          | Yes          | Yes          | No           | Yes          | No           | Yes           | Yes           | No            | Negative control    |

Ten seeds from each of nine  $T_1$  transgenic lines were grown to yield. PCR tests had previously established that nine of these  $T_1$  seed contained the transgene and one was a null segregant. The seed generated from each of the  $T_1$  plants comprised a  $T_2$  family that was either segregating for the transgene or homozygous for the transgene. Between 16 and 24 seed from each of the nine  $T_2$  families for each transgenic line were grown in 70 mL of nutrient solution (pH 4.3) with 30  $\mu$ M AlCl<sub>3</sub> on a platform shaker (100 rpm). Solutions were replaced daily. Aluminum resistance of each seedling in each family was scored after 5 d by assessing root length and by examining the root apices for tissue damage under a dissecting microscope. Likely homozygous families were identified as those in which all seedlings had good root growth and undamaged root apices.

FIG. S1 Relationship between *TaALMT1* expression and malate efflux in the  $T_1$  and  $T_2$  lines. *TaALMT1* expression was measured by qRT-PCR using the endogenous *GAPDH* gene as a reference in plants of the (A)  $T_1$  and (B)  $T_2$  generations. Since the data were collected over several experiments, the expression data are presented here relative to the parental line BW26 included to account for the variation between experiments. Expression data for the  $T_1$  lines represent the mean and s.e. of biological replicates ( $n = 3$ ) and for  $T_2$  it represents the mean of technical replicates ( $n = 3$ ). The  $Al^{3+}$ -activated malate efflux was measured from excised root apices in the presence of  $50 \mu M AlCl_3$ . Malate efflux was only detected in the presence of  $Al^{3+}$  treatment and data show means and standard errors ( $n = 4$ ). Open circles represent each of the (A)  $T_1$  and (B)  $T_2$  lines and the open triangle in (B) represents a null-segregant T2\_1-19. Filled circles represent ET8 and closed triangles represent BW26.

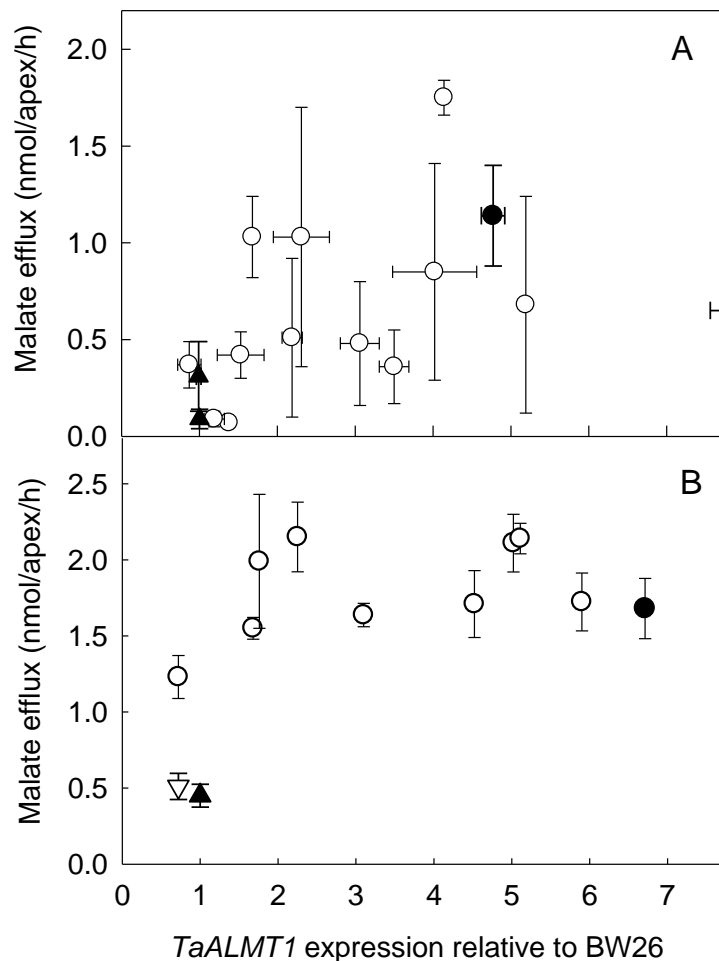

FIG. S2. Southern analysis of the  $T_2$  transgenic plants. Genomic DNA (10  $\mu$ g) isolated from the  $T_2$  lines identified as being probably homozygous for the transgene (based on an  $Al^{3+}$  resistance assay) was digested with *Bam*HI, run on an agarose gel and transferred to a membrane filter using the alkaline blotting method. The membrane was probed with a labelled PCR product targeting the maize ADH intron region of the plasmid. The column numbers show the following lines: (BW26) Bob White 26 (parent line); (1) T2\_1.6; (2) T2\_2B.1; (3) T2\_3.4; (4) T2\_4.4; (5) T2\_5.4; (6) T2\_8.5; (7) T2\_12.7; (8) T2\_18.1; (9) T2\_20A.8. Size markers are included on the right-hand side and the two arrows on the left-hand side show bands cross-reacting with the control parental line BW26.

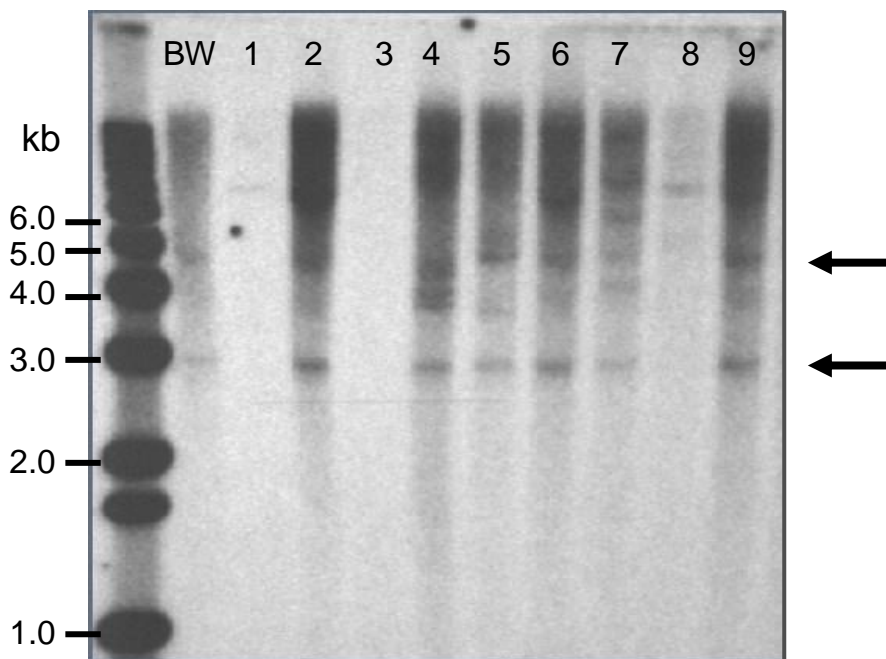

Supplement: mcq058_1.pdf [file mcq058_1.pdf]
